# Supplementary material for: Evaluation of Drug-Loading Ability of Poly(Lactic Acid)/Hydroxyapatite Core–Shell Particles
Source: MDPI journal article supplement (doi:10.3390/ma14081959), 2021-04-14
Supplement: s1 [file s1]

Supplementary materials

# Evaluation of Drug-Loading Ability of Poly(Lactic Acid)/Hydroxyapatite Core-shell Particles

Seiya Suzuki <sup>1,2</sup>, Sungho Lee <sup>1,\*</sup>, Tatsuya Miyajima <sup>1</sup>, Katsuya Kato <sup>1</sup>, Ayae Sugawara-Narutaki <sup>3</sup>, Makoto Sakurai <sup>2</sup> and Fukue Nagata <sup>1,\*</sup>

<sup>1</sup> National Institute of Advanced Industrial Science and Technology (AIST), 2266-98 Anagahora, Shimoshidami, Moriyama-ku, Nagoya 463-8560, Japan; seiya-suzuki@aist.go.jp (S.S.); t.miyajima@aist.go.jp (T.M.); katsuya-kato@aist.go.jp (K.K.)

<sup>2</sup> Department of Applied Chemistry, College of Engineering, Chubu University, Matsumoto-cho, Kasugai, Aichi 487-8501, Japan; sakurai@isc.chubu.ac.jp

<sup>3</sup> Department of Energy Engineering, Graduate School of Engineering, Nagoya University, Furo-cho, Chikusa-ku, Nagoya 464-8603, Japan; ayae@energy.nagoya-u.ac.jp

\* Correspondence: sungho.lee@aist.go.jp (S.L.); f.nagata@aist.go.jp (F.N.); Tel.: +81-52-736-7387 (F.N.)

**Citation:** Suzuki, S.; Lee, S.; Miyajima, T.; Kato, K.; Sugawara-Narutaki, A.; Sakurai, M.; Nagata, F. Evaluation of Drug-Loading Ability of Poly(Lactic Acid)/Hydroxyapatite Core-shell Particles. *Materials* **2021**, *14*, 1959. <https://doi.org/10.3390/ma14081959>

Academic Editor: Alben Lederer

Received: 26 February 2021

Accepted: 12 April 2021

Published: 14 April 2021

**Publisher's Note:** MDPI stays neutral with regard to jurisdictional claims in published maps and institutional affiliations.

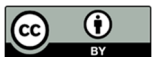

**Copyright:** © 2021 by the authors. Licensee MDPI, Basel, Switzerland. This article is an open access article distributed under the terms and conditions of the Creative Commons Attribution (CC BY) license (<http://creativecommons.org/licenses/by/4.0/>).

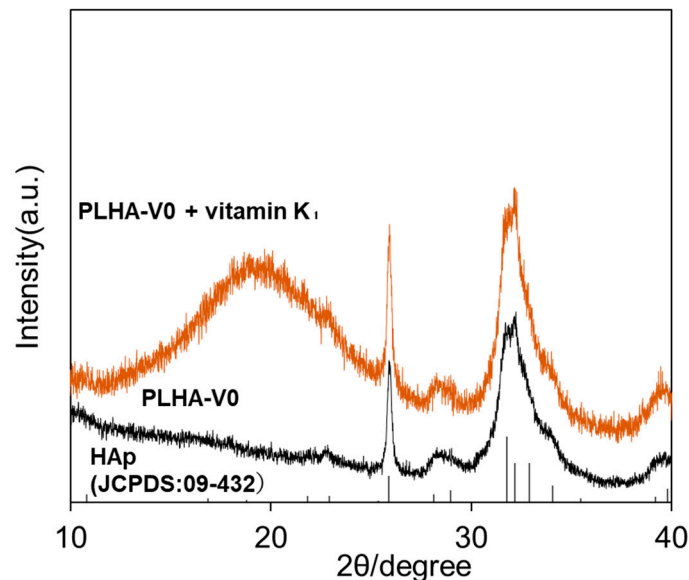

**Figure S1.** XRD patterns of PLHA-V0 and PLHA-V0 + vitamin K<sub>1</sub> mixture.

6 mg of PLHA-V0 and 3 mg of vitamin K<sub>1</sub> (liquid) was mixed for XRD measurement with non-reflective sample plate. The XRD conditions were as follows: CuK $\alpha$  radiation (40 kV, 30 mA), 2.0 deg/min, and a 2 $\theta$  range of 3°–60° (XRD; Rigaku, SmartLab). A halo peak at 18° was observed in the mixture of PLHA-V0 and vitamin K<sub>1</sub>. Thus, the halo peak originated from vitamin K<sub>1</sub> as an amorphous status.
